# Supplementary material
Source: PubMed Central journal article supplement (PMC1838744)
Supplement: pnas_0605302103_1.pdf [file pnas_0605302103_1.pdf]

Table 1. Frequencies of *Borrelia hermsii* serotypes in DNA sequence typing and antisera typing experiments

| Infecting serotype                 | No. mice (73 total) | Frequency of serotypes per immunocompetent BALB/c mouse in first relapse (DNA sequence typing) |       |       |       |       |       |       |       |       |       |       |       |       |       |       |       |       |       |       |       |       |       |       |       |       |       |       |  |
|------------------------------------|---------------------|------------------------------------------------------------------------------------------------|-------|-------|-------|-------|-------|-------|-------|-------|-------|-------|-------|-------|-------|-------|-------|-------|-------|-------|-------|-------|-------|-------|-------|-------|-------|-------|--|
|                                    |                     | 1                                                                                              | 2     | 3     | 4     | 5     | 6     | 7     | 8     | 9     | 10    | 11    | 12    | 13    | 14    | 16    | 17    | 18    | 19    | 21    | 22    | 23    | 24    | 25    | 27    | 42    | 46    | 58    |  |
| 7                                  | 32                  | 0.125                                                                                          | 0.188 | 0.000 | 0.000 | 0.000 | 0.188 | 0.000 | 0.000 | 0.000 | 0.000 | 0.000 | 0.000 | 0.000 | 0.000 | 0.000 | 0.125 | 0.313 | 0.000 | 0.000 | 0.000 | 0.000 | 0.375 | 0.000 | 0.000 | 0.000 | 0.000 | 0.000 |  |
| 17                                 | 41                  | 0.049                                                                                          | 0.243 | 0.024 | 0.048 | 0.000 | 0.024 | 0.146 | 0.000 | 0.000 | 0.000 | 0.000 | 0.000 | 0.024 | 0.073 | 0.049 | 0.268 | 0.000 | 0.024 | 0.000 | 0.024 | 0.122 | 0.000 | 0.073 | 0.024 | 0.048 | 0.024 |       |  |
| Mean freq by serotype <sup>a</sup> |                     | 0.082                                                                                          | 0.219 | 0.014 | 0.027 | 0.000 | 0.097 | 0.146 | 0.000 | 0.000 | 0.000 | 0.000 | 0.000 | 0.014 | 0.041 | 0.027 | 0.125 | 0.274 | 0.000 | 0.014 | 0.000 | 0.014 | 0.233 | 0.000 | 0.041 | 0.014 | 0.027 | 0.014 |  |

| Infecting serotype                    | No. mice (291 total) | Frequency (freq) of serotypes per immunocompetent Swiss mouse in first relapse (antisera typing) <sup>b</sup> |       |       |       |       |       |       |       |       |       |       |       |       |       |       |       |       |       |       |       |       |       |  |  |
|---------------------------------------|----------------------|---------------------------------------------------------------------------------------------------------------|-------|-------|-------|-------|-------|-------|-------|-------|-------|-------|-------|-------|-------|-------|-------|-------|-------|-------|-------|-------|-------|--|--|
|                                       |                      | 1                                                                                                             | 2     | 3     | 4     | 5     | 6     | 7     | 8     | 9     | 10    | 11    | 12    | 13    | 14    | 16    | 17    | 18    | 19    | 21    | 22    | 23    | 24    |  |  |
| 1                                     | 9                    | 0.889                                                                                                         | 0.000 | 0.000 | 0.000 | 0.000 | 0.000 | 0.889 | 0.000 | 0.000 | 0.000 | 0.000 | 0.111 | 0.111 | 0.000 | 0.667 | 0.111 | 0.000 | 0.000 | 0.000 | 0.000 | 0.000 | 0.556 |  |  |
| 2                                     | 9                    | 0.111                                                                                                         | 0.111 | 0.444 | 0.000 | 0.222 | 1.000 | 0.000 | 0.000 | 0.000 | 0.000 | 0.000 | 0.444 | 0.111 | 0.222 | 0.556 | 0.111 | 0.111 | 0.000 | 0.333 | 0.000 | 0.111 |       |  |  |
| 3                                     | 11                   | 0.000                                                                                                         | 0.455 | 0.000 | 0.000 | 0.091 | 0.909 | 0.000 | 0.000 | 0.000 | 0.364 | 0.000 | 0.727 | 0.000 | 0.000 | 0.545 | 0.000 | 0.000 | 0.000 | 0.000 | 0.000 | 0.091 |       |  |  |
| 4                                     | 10                   | 0.300                                                                                                         | 0.600 | 0.000 | 0.000 | 0.600 | 0.900 | 0.000 | 0.100 | 0.000 | 0.400 | 0.200 | 0.600 | 0.000 | 0.400 | 0.700 | 0.100 | 0.100 | 0.100 | 0.000 | 0.100 | 0.000 |       |  |  |
| 5                                     | 8                    | 0.250                                                                                                         | 0.750 | 0.000 | 0.125 | 0.375 | 1.000 | 0.000 | 0.000 | 0.000 | 0.250 | 0.000 | 0.250 | 0.125 | 0.000 | 0.125 | 0.375 | 0.375 | 0.000 | 0.000 | 0.000 | 0.375 |       |  |  |
| 6                                     | 8                    | 0.250                                                                                                         | 1.000 | 0.500 | 0.000 | 0.000 | 1.000 | 0.000 | 0.000 | 0.000 | 0.000 | 0.000 | 0.000 | 0.125 | 0.875 | 0.000 | 0.000 | 0.125 | 0.000 | 0.000 | 0.500 |       |       |  |  |
| 7                                     | 12                   | 0.250                                                                                                         | 0.750 | 0.000 | 0.167 | 0.000 | 0.333 | 0.000 | 0.000 | 0.000 | 0.500 | 0.000 | 0.000 | 0.250 | 0.417 | 0.583 | 0.333 | 0.083 | 0.667 | 0.000 | 0.000 | 0.167 |       |  |  |
| 8                                     | 10                   | 0.200                                                                                                         | 0.200 | 0.400 | 0.000 | 0.000 | 0.100 | 0.700 | 0.000 | 0.000 | 0.000 | 0.000 | 0.400 | 0.100 | 0.100 | 0.800 | 0.400 | 0.000 | 0.600 | 0.200 | 0.000 | 0.600 |       |  |  |
| 9                                     | 10                   | 0.600                                                                                                         | 1.000 | 0.100 | 0.000 | 0.000 | 0.100 | 0.900 | 0.000 | 0.000 | 0.100 | 0.700 | 0.100 | 0.100 | 0.100 | 0.400 | 0.100 | 0.000 | 0.500 | 0.000 | 0.000 | 0.800 |       |  |  |
| 10                                    | 9                    | 0.111                                                                                                         | 0.778 | 0.222 | 0.000 | 0.000 | 0.000 | 1.000 | 0.000 | 0.000 | 0.000 | 0.222 | 0.111 | 0.000 | 0.111 | 0.556 | 0.111 | 0.000 | 0.556 | 0.000 | 0.000 | 0.889 |       |  |  |
| 11                                    | 10                   | 0.200                                                                                                         | 0.500 | 0.100 | 0.100 | 0.000 | 0.000 | 0.700 | 0.100 | 0.000 | 0.000 | 0.000 | 0.200 | 0.100 | 0.000 | 0.600 | 0.200 | 0.000 | 0.200 | 0.000 | 0.000 | 0.600 |       |  |  |
| 12                                    | 12                   | 0.000                                                                                                         | 0.500 | 0.000 | 0.000 | 0.000 | 0.000 | 1.000 | 0.000 | 0.000 | 0.083 | 0.000 | 0.000 | 0.083 | 0.083 | 0.833 | 0.000 | 0.000 | 0.000 | 0.000 | 0.000 | 0.583 |       |  |  |
| 13                                    | 17                   | 0.059                                                                                                         | 0.235 | 1.000 | 0.118 | 0.059 | 0.059 | 0.765 | 0.176 | 0.000 | 0.000 | 0.000 | 0.059 | 0.118 | 0.059 | 1.000 | 0.059 | 0.000 | 0.176 | 0.176 | 0.000 | 0.235 |       |  |  |
| 14                                    | 12                   | 0.083                                                                                                         | 0.417 | 0.083 | 0.417 | 0.000 | 0.000 | 0.750 | 0.000 | 0.167 | 0.417 | 0.083 | 0.667 | 0.250 | 0.000 | 0.917 | 0.250 | 0.083 | 0.083 | 0.083 | 0.000 | 0.667 |       |  |  |
| 16                                    | 42                   | 0.048                                                                                                         | 0.357 | 0.286 | 0.643 | 0.024 | 0.095 | 0.881 | 0.071 | 0.000 | 0.000 | 0.095 | 0.071 | 0.333 | 0.167 | 0.286 | 0.310 | 0.024 | 0.095 | 0.000 | 0.333 | 0.452 |       |  |  |
| 17                                    | 7                    | 0.143                                                                                                         | 0.857 | 0.000 | 0.143 | 0.000 | 0.286 | 1.000 | 0.000 | 0.000 | 0.000 | 0.714 | 0.143 | 0.571 | 0.143 | 0.143 | 0.143 | 0.000 | 0.143 | 0.000 | 0.000 | 0.143 |       |  |  |
| 18                                    | 39                   | 0.077                                                                                                         | 0.436 | 0.077 | 0.000 | 0.000 | 0.077 | 0.641 | 0.026 | 0.026 | 0.000 | 0.000 | 0.308 | 0.359 | 0.051 | 0.436 | 0.615 | 0.000 | 0.205 | 0.000 | 0.000 | 0.179 |       |  |  |
| 19                                    | 10                   | 0.400                                                                                                         | 0.800 | 0.100 | 0.200 | 0.200 | 0.400 | 1.000 | 0.000 | 0.100 | 0.000 | 0.300 | 0.100 | 0.500 | 0.000 | 0.000 | 0.200 | 0.000 | 0.100 | 0.000 | 0.000 | 0.200 |       |  |  |
| 21                                    | 7                    | 0.286                                                                                                         | 0.857 | 0.000 | 0.000 | 0.000 | 0.571 | 1.000 | 0.000 | 0.286 | 0.000 | 0.143 | 0.571 | 0.000 | 0.000 | 0.000 | 0.857 | 0.143 | 0.000 | 0.000 | 0.000 | 0.000 |       |  |  |
| 22                                    | 10                   | 0.100                                                                                                         | 0.700 | 0.500 | 0.000 | 0.000 | 0.000 | 1.000 | 0.400 | 0.100 | 0.000 | 0.000 | 0.100 | 0.400 | 0.400 | 0.200 | 0.700 | 0.600 | 0.000 | 0.600 | 0.000 | 0.100 |       |  |  |
| 23                                    | 20                   | 0.250                                                                                                         | 0.750 | 0.000 | 0.600 | 0.050 | 0.150 | 0.900 | 0.000 | 0.100 | 0.050 | 0.000 | 0.250 | 0.700 | 0.050 | 0.200 | 0.450 | 0.200 | 0.050 | 0.250 | 0.000 | 0.550 |       |  |  |
| 24                                    | 9                    | 0.000                                                                                                         | 0.333 | 0.222 | 0.000 | 0.000 | 0.111 | 0.778 | 0.333 | 0.111 | 0.000 | 0.000 | 0.000 | 0.111 | 0.000 | 0.222 | 0.444 | 0.000 | 0.000 | 0.000 | 0.000 | 0.000 |       |  |  |
| Mean freq by serotype <sup>a</sup>    |                      | 0.177                                                                                                         | 0.627 | 0.176 | 0.141 | 0.016 | 0.170 | 0.891 | 0.053 | 0.051 | 0.026 | 0.140 | 0.161 | 0.294 | 0.091 | 0.134 | 0.605 | 0.169 | 0.039 | 0.210 | 0.038 | 0.021 | 0.371 |  |  |
| Serotype freq - all mice <sup>c</sup> |                      | 0.144                                                                                                         | 0.543 | 0.186 | 0.196 | 0.017 | 0.137 | 0.821 | 0.052 | 0.048 | 0.024 | 0.107 | 0.162 | 0.302 | 0.093 | 0.148 | 0.564 | 0.162 | 0.031 | 0.196 | 0.031 | 0.052 | 0.357 |  |  |

<sup>a</sup>Mean of the frequencies for each infecting serotype.<sup>b</sup>Unpublished data of Herbert Stoenner, Rocky Mountain Laboratory, National Institutes of Health, 1/5/80-4/11/81, using methods described in reference 16. Only serotype-specific immunofluorescence reactions (i.e., score of 5 out of 5) of fluorescein-labeled polyclonal antibodies against fixed spirochetes in blood smears on slides were used.<sup>c</sup>(Number of mice with a given serotype in the relapse)/(total number of mice).
