# Supplementary material
Source: PubMed Central journal article supplement (PMC1838744)
Supplement: pnas_0605302103_2.pdf [file pnas_0605302103_2.pdf]

Table 4. Characteristics of silent variants of *Borrelia hermsii* HS1

| VARIANT | FAMILY                | FAMSIZE | PLASMID | STRAND | UHSID | DHSDIST | SCORE | ASFRQ | DNAFRQ | EXPOBS | FREQCL |
|---------|-----------------------|---------|---------|--------|-------|---------|-------|-------|--------|--------|--------|
| 1       | <i>vsp</i>            | 20      | 6       | 0      | 0.74  | 42      | 3     | 0.177 | 0.082  | 1      | 2      |
| 2       | <i>vsp</i>            | 20      | 6       | 0      | 0.84  | 43      | 3     | 0.627 | 0.219  | 1      | 3      |
| 3       | <i>vsp</i>            | 20      | 7       | 0      | 0.82  | 9884    | 2     | 0.176 | 0.014  | 1      | 2      |
| 4       | $\delta$ - <i>vlp</i> | 9       | 7       | 0      | 0.30  | 10659   | 1     | 0.141 | 0.027  | 1      | 2      |
| 5       | $\gamma$ - <i>vlp</i> | 13      | 1       | 1      | 0.26  | 10851   | 1     | 0.016 | 0.000  | 1      | 1      |
| 6       | <i>vsp</i>            | 20      | 2       | 0      | 0.80  | 43      | 3     | 0.170 | 0.097  | 1      | 2      |
| 7       | $\alpha$ - <i>vlp</i> | 7       | 2       | 0      | 0.93  | 43      | 3     | 0.891 | 0.146  | 1      | 3      |
| 8       | <i>vsp</i>            | 20      | 4       | 0      | 0.34  | 2003    | 1     | 0.053 | 0.000  | 1      | 1      |
| 9       | $\beta$ - <i>vlp</i>  | 8       | 6       | 1      | 0.99  | 18183   | 2     | 0.051 | 0.000  | 1      | 1      |
| 10      | $\beta$ - <i>vlp</i>  | 8       | 7       | 0      | 0.39  | 16403   | 1     | 0.026 | 0.000  | 1      | 1      |
| 11      | <i>vsp</i>            | 20      | 4       | 0      | 0.88  | 2881    | 2     | 0.140 | 0.000  | 1      | 1      |
| 12      | $\beta$ - <i>vlp</i>  | 8       | 8       | 0      | 0.92  | 8412    | 2     | 0.162 | 0.000  | 1      | 1      |
| 13      | <i>vsp</i>            | 20      | 1       | 0      | 0.94  | 8002    | 2     | 0.294 | 0.014  | 1      | 2      |
| 14      | $\beta$ - <i>vlp</i>  | 8       | 8       | 0      | 0.98  | 79      | 3     | 0.091 | 0.041  | 1      | 2      |
| 16      | $\delta$ - <i>vlp</i> | 9       | 3       | 0      | 0.62  | 4446    | 2     | 0.134 | 0.027  | 1      | 2      |
| 17      | $\delta$ - <i>vlp</i> | 9       | 9       | 0      | 0.82  | 80      | 3     | 0.605 | 0.125  | 1      | 3      |
| 18      | $\alpha$ - <i>vlp</i> | 7       | 7       | 0      | 0.80  | 117     | 3     | 0.169 | 0.274  | 1      | 3      |
| 19      | $\gamma$ - <i>vlp</i> | 13      | 1       | 1      | 0.26  | 6152    | 1     | 0.039 | 0.000  | 1      | 1      |
| 21      | $\alpha$ - <i>vlp</i> | 7       | 3       | 0      | 0.99  | 65      | 3     | 0.210 | 0.014  | 1      | 2      |
| 22      | <i>vsp</i>            | 20      | 4       | 0      | 0.74  | 43      | 3     | 0.038 | 0.000  | 1      | 1      |
| 23      | $\delta$ - <i>vlp</i> | 9       | 4       | 1      | 0.97  | 10184   | 2     | 0.021 | 0.014  | 1      | 2      |
| 24      | <i>vsp</i>            | 20      | 6       | 0      | 0.92  | 42      | 3     | 0.371 | 0.233  | 1      | 3      |
| 25      | $\alpha$ - <i>vlp</i> | 7       | 3       | 0      | 0.23  | 3599    | 1     | .     | 0.000  | 1      | 1      |
| 27      | <i>vsp</i>            | 20      | 6       | 0      | 0.74  | 3436    | 2     | .     | 0.041  | 1      | 2      |
| 28      | <i>vsp</i>            | 20      | 1       | 0      | 0.79  | 5690    | 2     | .     | .      | 0      | 1      |
| 30      | <i>vsp</i>            | 20      | 3       | 0      | 0.84  | 6067    | 2     | .     | .      | 0      | 1      |
| 32      | $\beta$ - <i>vlp</i>  | 8       | 4       | 0      | 0.74  | 7754    | 2     | .     | .      | 0      | 1      |
| 34      | $\beta$ - <i>vlp</i>  | 8       | 3       | 0      | 0.41  | 65      | 2     | .     | .      | 0      | 1      |
| 36      | $\delta$ - <i>vlp</i> | 9       | 1       | 0      | 0.75  | 8771    | 2     | .     | .      | 0      | 1      |
| 37      | $\gamma$ - <i>vlp</i> | 13      | 6       | 0      | 0.38  | 10958   | 1     | .     | .      | 0      | 1      |
| 39      | $\gamma$ - <i>vlp</i> | 13      | 1       | 1      | 0.23  | 3062    | 1     | .     | .      | 0      | 1      |
| 42      | $\delta$ - <i>vlp</i> | 9       | 4       | 0      | 0.80  | 41      | 3     | .     | 0.014  | 1      | 2      |
| 43      | $\gamma$ - <i>vlp</i> | 13      | 7       | 0      | 0.62  | 11892   | 2     | .     | .      | 0      | 1      |
| 44      | $\alpha$ - <i>vlp</i> | 7       | 6       | 1      | 0.97  | 13778   | 2     | .     | .      | 0      | 1      |
| 46      | $\beta$ - <i>vlp</i>  | 8       | 6       | 1      | 0.95  | 16957   | 2     | .     | 0.027  | 1      | 2      |
| 48      | $\gamma$ - <i>vlp</i> | 13      | 4       | 0      | 0.99  | 780     | 2     | .     | .      | 0      | 1      |
| 49      | $\gamma$ - <i>vlp</i> | 13      | 6       | 1      | 0.98  | 19365   | 2     | .     | .      | 0      | 1      |
| 53      | $\gamma$ - <i>vlp</i> | 13      | 8       | 1      | 0.25  | 10260   | 1     | .     | .      | 0      | 1      |
| 54      | $\gamma$ - <i>vlp</i> | 13      | 8       | 0      | 0.90  | 7254    | 2     | .     | .      | 0      | 1      |
| 56      | $\delta$ - <i>vlp</i> | 9       | 7       | 0      | 0.59  | 15288   | 1     | .     | .      | 0      | 1      |
| 58      | <i>vsp</i>            | 20      | 4       | 0      | 0.31  | 43      | 2     | .     | 0.014  | 1      | 2      |
| 59      | <i>vsp</i>            | 20      | 6       | 1      | 0.57  | 13013   | 1     | .     | .      | 0      | 1      |
| 61      | $\delta$ - <i>vlp</i> | 9       | 5       | 0      | 0.93  | 15641   | 2     | .     | .      | 0      | 1      |
| 62      | $\alpha$ - <i>vlp</i> | 7       | 5       | 0      | 0.84  | 14390   | 2     | .     | .      | 0      | 1      |
| 63      | <i>vsp</i>            | 20      | 5       | 0      | 0.62  | 12340   | 2     | .     | .      | 0      | 1      |
| 64      | $\gamma$ - <i>vlp</i> | 13      | 5       | 0      | 0.23  | 11099   | 1     | .     | .      | 0      | 1      |
| 65      | $\gamma$ - <i>vlp</i> | 13      | 8       | 0      | 0.59  | 18489   | 1     | .     | .      | 0      | 1      |
| 66      | <i>vsp</i>            | 20      | 8       | 1      | 0.86  | 3353    | 2     | .     | .      | 0      | 1      |
| 68      | <i>vsp</i>            | 20      | 7       | 0      | 0.76  | 2715    | 2     | .     | .      | 0      | 1      |
| 69      | <i>vsp</i>            | 20      | 7       | 0      | 0.36  | 17701   | 1     | .     | .      | 0      | 1      |
| 70      | $\alpha$ - <i>vlp</i> | 7       | 7       | 0      | 0.31  | 14013   | 1     | .     | .      | 0      | 1      |
| 71      | $\beta$ - <i>vlp</i>  | 8       | 7       | 0      | 0.41  | 12901   | 1     | .     | .      | 0      | 1      |
| 72      | <i>vsp</i>            | 20      | 6       | 0      | 0.43  | 12119   | 1     | .     | .      | 0      | 1      |
| 73      | $\gamma$ - <i>vlp</i> | 13      | 3       | 0      | 0.25  | 3350    | 1     | .     | .      | 0      | 1      |
| 75      | <i>vsp</i>            | 20      | 8       | 0      | 0.64  | 446     | 1     | .     | .      | 0      | 1      |
| 76      | $\delta$ - <i>vlp</i> | 9       | 8       | 1      | 0.89  | 9095    | 2     | .     | .      | 0      | 1      |
| 77      | $\gamma$ - <i>vlp</i> | 13      | 8       | 0      | 0.34  | 9639    | 1     | .     | .      | 0      | 1      |

VARIANT: *vsp* or *vlp* gene conferring serotype identity (Supplementary Figure 1).

FAMILY: *vsp* gene family or  $\alpha$ -*vlp*,  $\beta$ -*vlp*,  $\gamma$ -*vlp*, or  $\delta$ -*vlp* gene sub-families<sup>17</sup>.

FAMSIZE: Number of genes in gene family or sub-family<sup>17</sup>.

PLASMID: Location of gene on 9 plasmid sequence contigs; the expression plasmid is 1.

STRAND: Same (= 0) or opposite (=1) orientation as the next downstream DHS element.

UHSID: % nucleotide (nt) identity with the 61 nts of UHS region.

DHSDIST: nt from gene stop codon to nearest downstream DHS or fragment end.

SCORE: 1=UHSID <0.6 and log<sub>10</sub> DHS ≥2.5; 2=UHSID ≥0.6 or DHS <2.5; 3= UHSID ≥0.6 and DHS <2.5.

ASFRQ: Frequency per immunocompetent mouse of serotype in first relapse by antisera typing (Table S1).

DNAFRQ: Frequency per immunocompetent mouse serotype in first relapse by DNA sequence typing.

EXPOBS: Expression of *vsp* or *vlp* variant gene observed (=1) or not observed (=0).

FREQCL: Frequency class 3 = ASFRQ ≥0.35 and/or DNAFRQ ≥0.2; class 2 = ASFRQ ≥0.2 and/or DNAFRQ >0; class 3 = ASFRQ <0.2 and DNAFRQ = 0, or EXPOBS = 0.
